# Supplementary material for: Co-delivery of a tumor microenvironment-responsive disulfiram prodrug and CuO2 nanoparticles for efficient cancer treatment
Source: Royal Society of Chemistry journal article supplement (doi:10.1039/d3na00004d), 2023-01-01
Supplement: d3na00004d1.pdf [file d3na00004d1.pdf]

## Supporting Information

### **Codelivery of a tumor microenvironment-responsive disulfiram prodrug and CuO<sub>2</sub> nanoparticles for efficient cancer treatment**

Fen-Ting Cheng,<sup>a</sup> Ya-Di Geng,<sup>a</sup> Yun-Xiao Liu,<sup>b</sup> Xuan Nie,<sup>c</sup> Xin-Ge Zhang,<sup>b</sup> Zhao-Lin Chen,<sup>a</sup> Li-Qin Tang,<sup>\*a</sup> Long-Hai Wang,<sup>\*c</sup> Ye-Zi You,<sup>a,c</sup> Lei Zhang<sup>\*a,b</sup>

<sup>a</sup> Department of Pharmacy, The First Affiliated Hospital of USTC, Division of Life Sciences and Medicine, University of Science and Technology of China, Hefei, Anhui, 230001, China

<sup>b</sup> Institute of Clinical Pharmacology, Anhui Medical University, Hefei, Anhui, 230032, China

<sup>c</sup> Department of Polymer Science and Engineering, University of Science and Technology of China, Hefei, Anhui 230026, China

\*To whom correspondence should be addressed.

E-mail: [zhanglei6@ustc.edu.cn](mailto:zhanglei6@ustc.edu.cn) (L. Z.)

E-mail: [tangliqin@ustc.edu.cn](mailto:tangliqin@ustc.edu.cn) (L.-Q. T.)

E-mail: [hiwang@ustc.edu.cn](mailto:hiwang@ustc.edu.cn) (L.-H. W.)

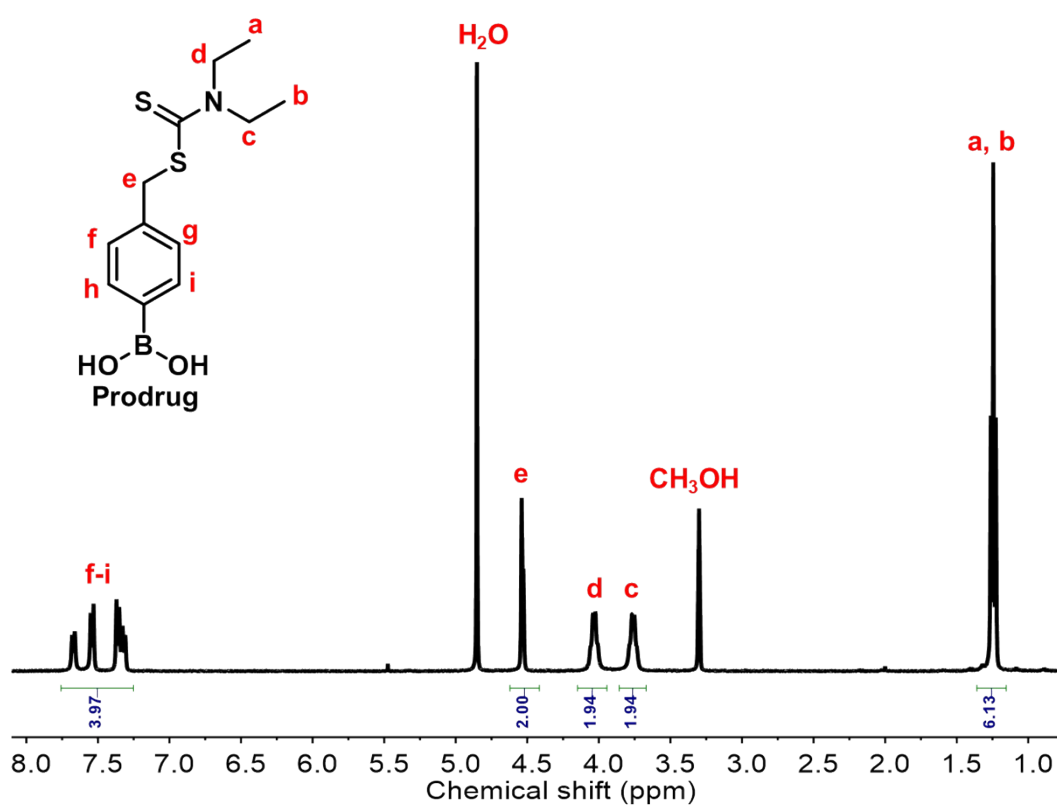

Fig. S1.  $^1\text{H-NMR}$  spectrum of the prodrug in  $\text{CD}_3\text{OD}$ , 400MHz.

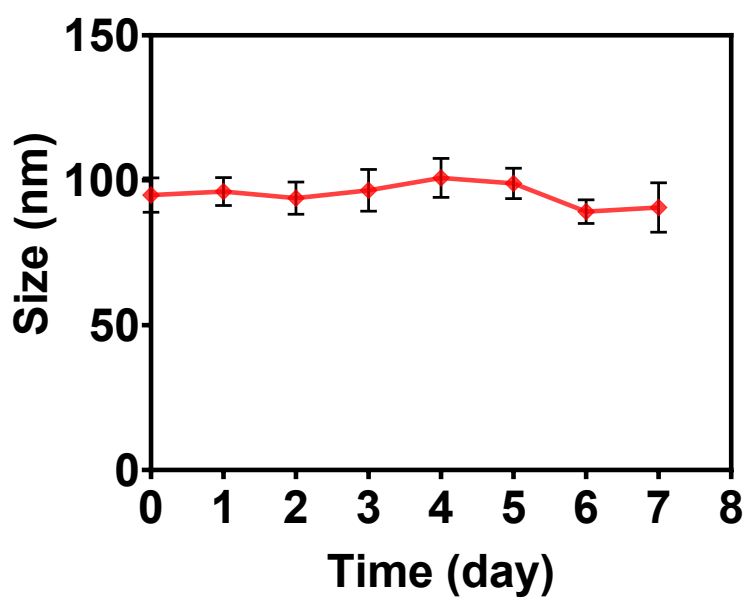

**Fig. S2.** Curve of particle size change of Cu@P-B nanoparticles in 7 days.

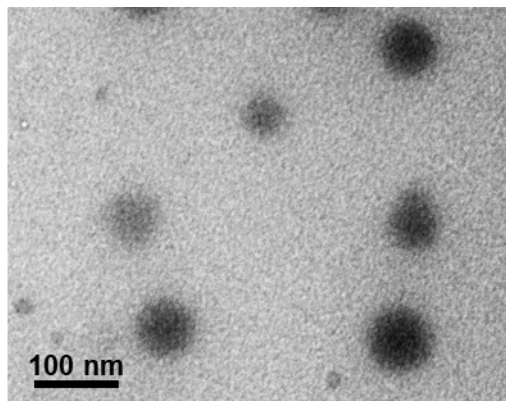

**Fig. S3.** TEM image of synthesized P-B NPs.

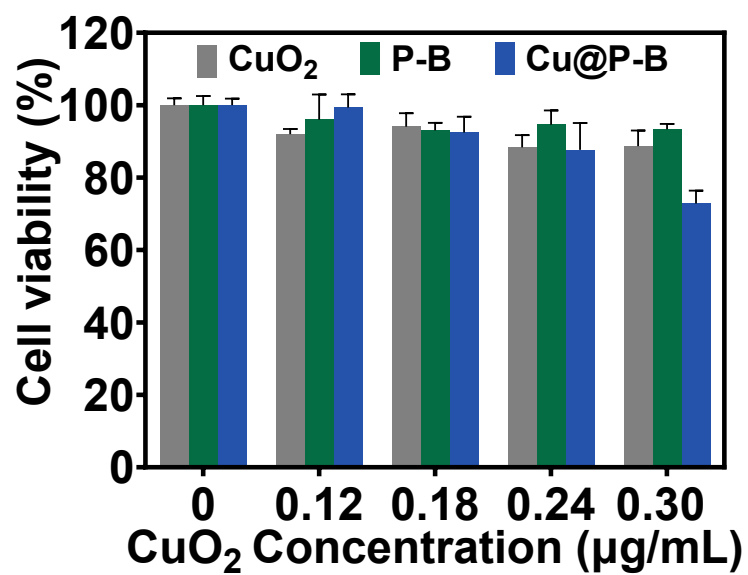

**Fig. S4.** The viability of 293T cells treated with different concentrations of CuO<sub>2</sub>, P-B, and Cu@P-B for 24 h.

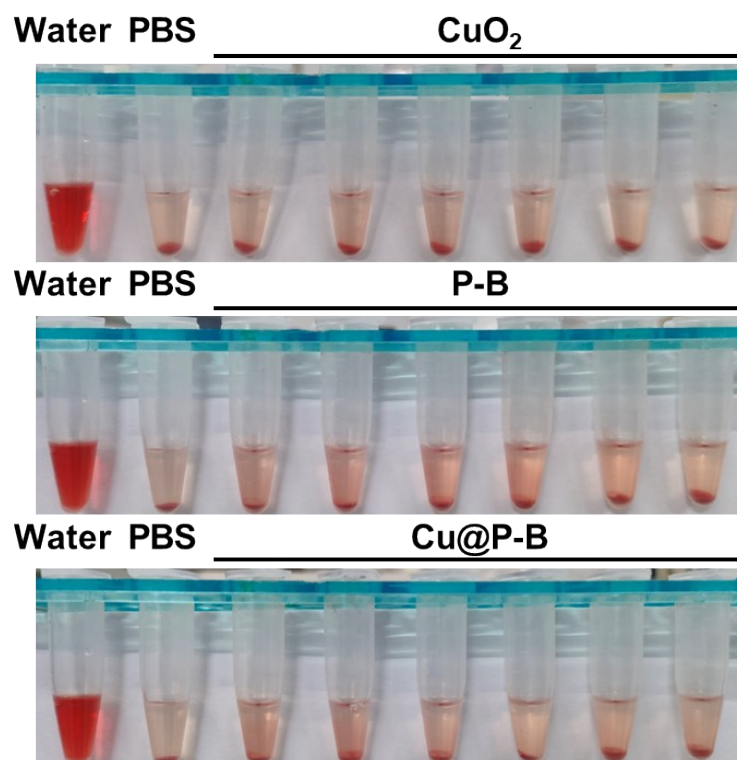

**Fig. S5.** The hemolytic results of CuO<sub>2</sub>, P-B, and Cu@P-B at different concentrations.

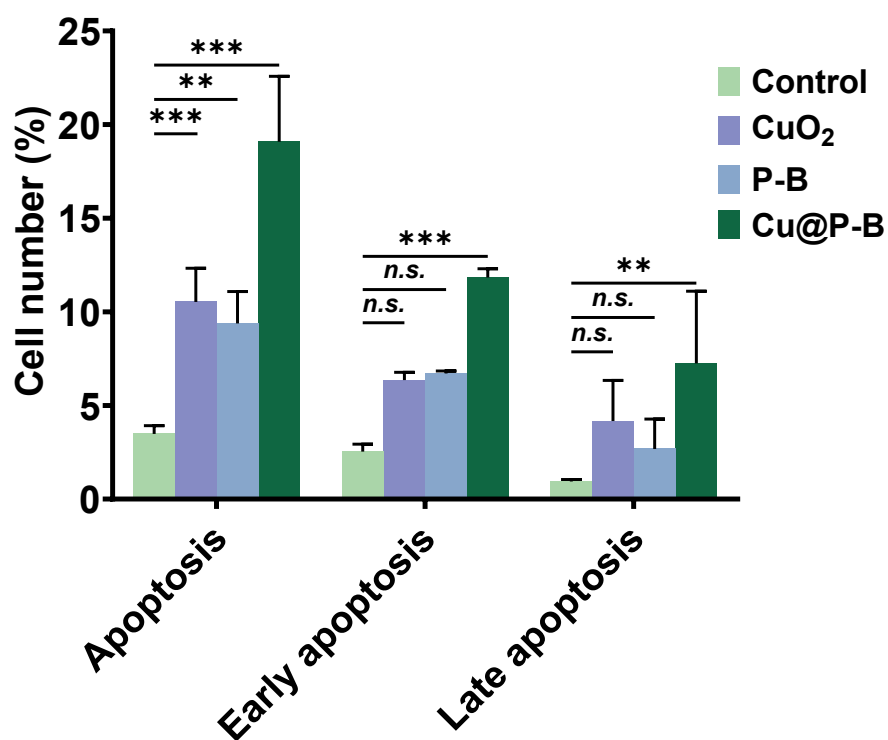

**Fig. S6.** The relative percentage of apoptotic (lower-right quadrant plus upper-right quadrant in Fig. 3a), early apoptotic (lower-right quadrant in Fig. 3a), and late apoptotic (upper-right quadrant in Fig. 3a) cells (n = 3, \*p < 0.05, \*\*p < 0.01, and \*\*\*p < 0.001).

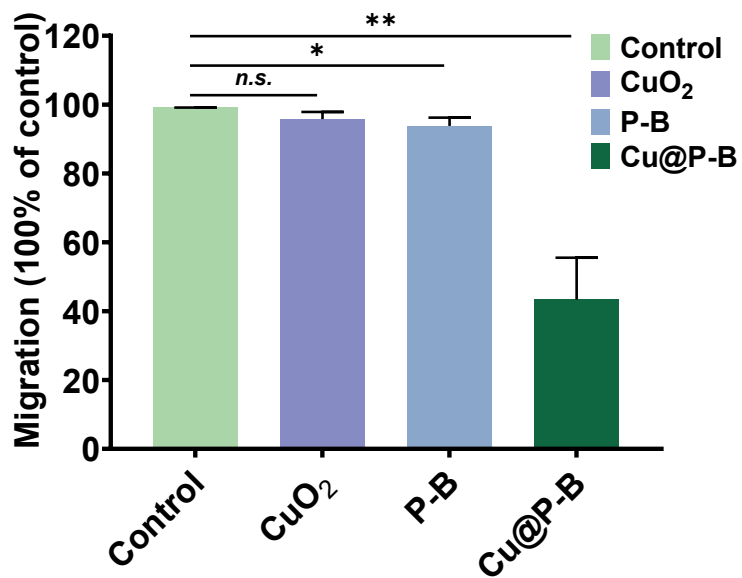

**Fig. S7.** Statistical analysis of cell migration indicated that treatment with Cu@P-B led to a significant decrease in cell migration when compared with the corresponding control,  $n = 3$ ,  $*p < 0.05$ ,  $**p < 0.01$ ,  $***p < 0.001$ .



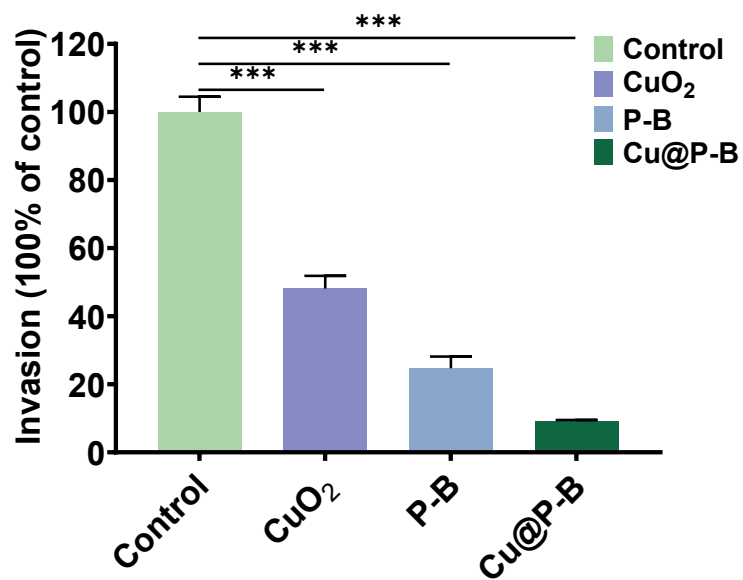

**Fig. S8.** Statistical analysis of cell invasion showed that treatment with CuO<sub>2</sub>, P-B, Cu@P-B led to a dramatic decrease in cell invasion when compared with the control, n = 3, \*p < 0.05, \*\*p < 0.01, \*\*\*p < 0.001.

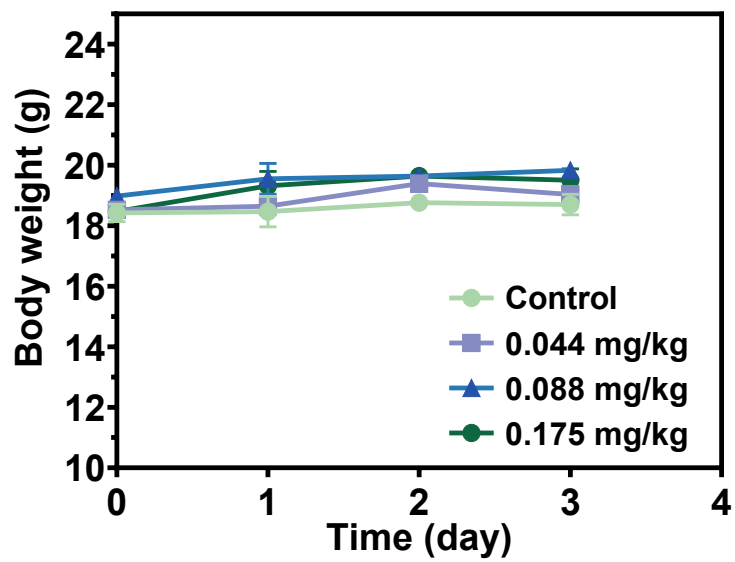

**Fig. S9.** Body weight changes of mice injected with different doses of Cu@P-B. n = 3.

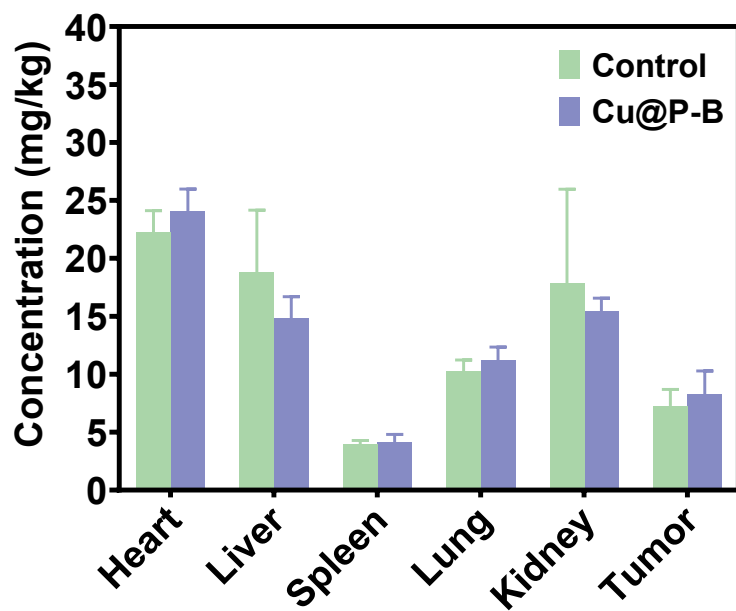

**Fig. S10.** The distribution of Cu in the major organs (heart, liver, spleens, lung, and kidney) and tumors of 4T1 tumor-bearing mice after Cu@P-B NPs treatment for 12 h.

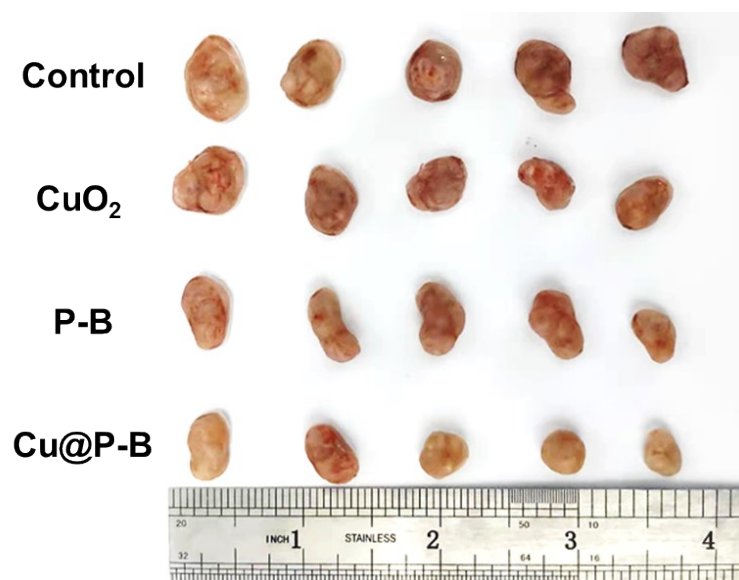

**Fig. S11.** Picture of the excised tumors after different treatments for 16 days.

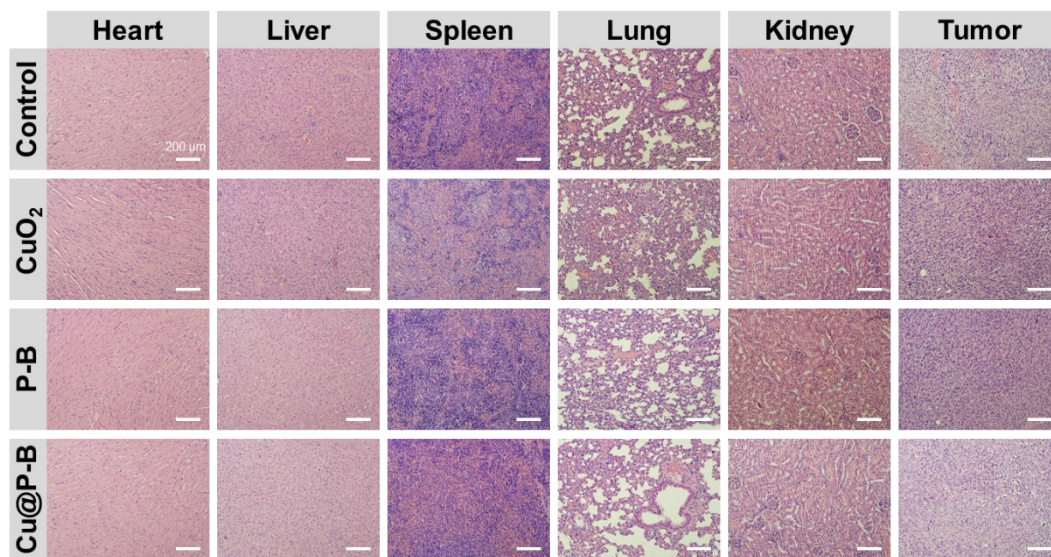

**Fig. S12.** H&E results of tumor tissues and heart, liver, spleen, lung, and kidney harvested from corresponding mice after 16 days of various treatments. The scale bar is 200  $\mu\text{m}$ .
